# Supplementary material for: Epigenomic, genomic, and transcriptomic landscape of schwannomatosis
Source: PubMed Central journal article supplement (PMC7785562; doi:10.1007/s00401-020-02230-x), 2020-10-06
Supplement: 401_2020_2230_MOESM1_ESM.pdf [file 401_2020_2230_MOESM1_ESM.pdf]

## Online Resources

### Epigenomic, genomic, and transcriptomic landscape of schwannomatosis

Sheila Mansouri<sup>1‡</sup>, Suganth Suppiah<sup>1‡</sup>, Yasin Mamatjan<sup>1‡</sup>, Irene Paganini<sup>2‡</sup>, Jeffrey C. Liu<sup>1</sup>, Shirin Karimi<sup>1</sup>, Vikas Patil<sup>1</sup>, Farshad Nassiri<sup>1</sup>, Olivia Singh<sup>1</sup>, Yogi Sundaravadanam<sup>3</sup>, Prisni Rath<sup>3</sup>, Roberta Sestini<sup>2</sup>, Francesca Gensini<sup>2</sup>, Sameer Agnihotri<sup>4</sup>, Jaishri Blakeley<sup>5</sup>, Kimberly Ostrow<sup>5</sup>, David Largaespada<sup>6</sup>, Scott R. Plotkin<sup>7</sup>, Anat Stemmer-Rachamimov<sup>7</sup>, **Marcela Maria Ferrer**<sup>8</sup>, Trevor J. Pugh<sup>3</sup>, Kenneth D. Aldape<sup>9</sup>, Laura Papi<sup>2</sup>, Gelareh Zadeh<sup>1\*</sup>

<sup>1</sup> Princess Margaret Cancer Center and MacFeeters-Hamilton Center for Neuro-Oncology Research, University Health Network, Toronto, ON, Canada

<sup>2</sup> The Department of Experimental and Clinical Biomedical Sciences "Mario Serio", Medical Genetics Unit, University of Florence, Florence, Italy

<sup>3</sup> Ontario Institute for Cancer Research, Toronto, ON, Canada

<sup>4</sup> Children's Hospital, Department of Neurological Surgery, University of Pittsburgh, PA, USA

<sup>5</sup> Johns Hopkins University, Baltimore, MD, USA

<sup>6</sup> Department of Paediatrics, University of MN, USA

<sup>7</sup> Department of Pathology, Massachusetts General Hospital, Boston, MA, USA

<sup>8</sup> Hospital de Clínicas "José de San Martín", División de Neurocirugía and División Genética, Universidad de Buenos Aires, Buenos Aires, Argentina

<sup>9</sup> Laboratory of Pathology, Center for Cancer Research, National Cancer Institute, Bethesda, MD, USA

‡ These authors contributed equally to the manuscript

#### \* Corresponding author:

Gelareh Zadeh, MD, PhD, FRCS(C)

Senior Scientist, Princess Margaret Research Institute

Head, Division of Neurosurgery, Toronto Western Hospital

Co-Director, Krembil Brain Institute

Wilkins Family Chair in Brain Tumor Research

14-701 PMCRT, 101 College St.,

Toronto, ON, Canada, M5G 1L7

Email: [Gelareh.zadeh@uhn.ca](mailto:Gelareh.zadeh@uhn.ca)

Tel: 416-634-8728

## Online resource figure legends

**Online resource figure 1. DNA methylation landscape of SWNTS-SWNs in the spectrum of benign PNSTs.** (a) tSNE plots generated based on the top 10,000 most variably methylated CpGs in SWNTS-SWNs (N=42), NS-SWNs (N=73), NF2-SWN (N=2), and NF (N=90). Color codes denote tumor type (SWNTS-SWNs, NS-SWNs, NF2-SWN, or NF) and symbols denote tumor germline mutation status or (b) tumor location. (c) Unsupervised hierarchical clustering of the top 2,000 most variably methylated CpGs in SWNTS-SWNs and NS-SWNs (excluding NF). (d) Plot showing the methylated status of top variable CpGs sites in SWNTS-SWNs versus NS-SWNs and their distribution across different regions associated with the genes. (e) Plot showing methylation status (average beta value) of LINE-1 and ALU repetitive elements in SWNTS-SWNs and NS-SWN cases. (f) Plot showing the fold change in expression of *TET1*, *TET2*, *DNMT1* and *DNMT3A* in SWNTS-SWNs (N=24) versus NS-SWNs (N=41). (g) Volcano plot showing the methylation status of top variable CpGs in germline *LZTR1*-mutant (N=17) versus *LZTR1*-wildtype (N=25) SWNTS-SWNs. (h) Unsupervised hierarchical clustering of the top 2,000 most variably methylated CpGs in SWNTS-SWNs (N=88). Color codes denote tumor type, germline mutation status, somatic mutations in NF2, tumor location, painful tumors, and patient sex.

**Online resource figure 2. Landscape of somatic alterations in SWNTS-SWNs.** (a) TMB in SWNTS-SWNs relative to other tumor types based on WES analysis. (b) Variant allele frequency and distribution of somatic single nucleotide variants in *NF2* gene in SWNTS-SWNs and NS-SWNs, and germline mutations in *LZTR1* and *SMARCB1* in SWNTS. (c) Integrated genomic view of copy number alterations across

the whole genome of SWNTS-SWNs samples based on WGS data. **(d)** Compound CNV plot generated based on DNA methylation data showing more extensive alterations in SWNTS-SWNs versus NS-SWNs across the genome. **(e)** Oncoprint showing top most frequently deleted genes on 22q and the plot to the right shows log<sub>2</sub> fold change in expression of these genes in SWNTS-SWNs (N=24) versus NS-SWNs (N=41). \* denotes P<0.01. **(f)** Plots showing arm-level copy number changes in individual SWNTS-SWN samples in each of the three germline mutation groups.

**Online resource figure 3. Pathways associated with key molecular alterations in SWNTS-SWNs.** **(a)** GSEA enrichment plot of the RAS/MAPK pathway activation in germline *LZTR1*-mutant vs. *LZTR1*-wildtype and *NF2*-mutant vs. *NF2*-wildtype SWNTS-SWNs. **(b)** GSEA was performed to identify top deregulated cellular pathways in *LZTR1*-mutant vs. *LZTR1*-wildtype, *SMARCB1*-mutant (N=2) vs. *SMARCB1*-wildtype (N=22), and *NF2*-mutant (N=16) vs. *NF2*-wildtype (N=7). Red circles denote upregulated while blue circles denote down-regulated pathways. Overlapping pathways are shown in shared squares.

**Online resource figure 4. Gene fusions in SWNs.** Oncoprint showing the top in-frame and out-of-frame gene fusions identified in SWNTS-SWNs and their prevalence in NS-SWNs. Color codes denote tumor type, germline mutations status, anatomic location, patient sex, and number of somatic hits per tumor based on WES data.

**Online resource figure 5. Transcriptome profile of pain related pathways in SWNTS-SWNs.** **(a)** Plot showing the proportion of samples from each anatomic location associated with pain. **(b)** GSEA analysis of RAS/MAPK activation in painful (N=12) versus non-painful (N=8) SWNTS-SWNs and its downregulation in TR and SP (mid-

body, N=11) versus LE and UE (extremities, N=13). **(c)** Top enrichment scoring cellular pathways in painful versus non-painful SWNTS-SWNs and tumors from extremities versus mid-body. **(d)** Plot showing expression of pain-related genes that are significantly ( $q < 0.05$ ) up- or downregulated in painful versus non-painful tumors.

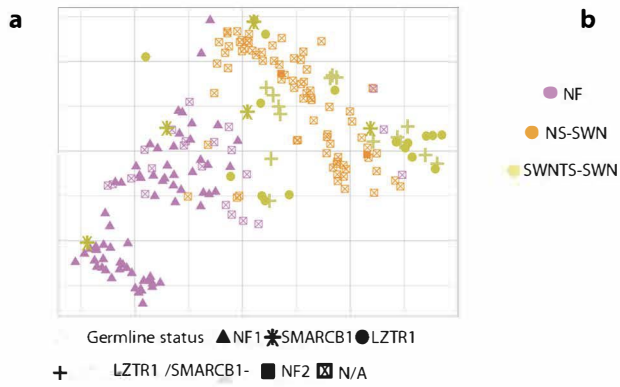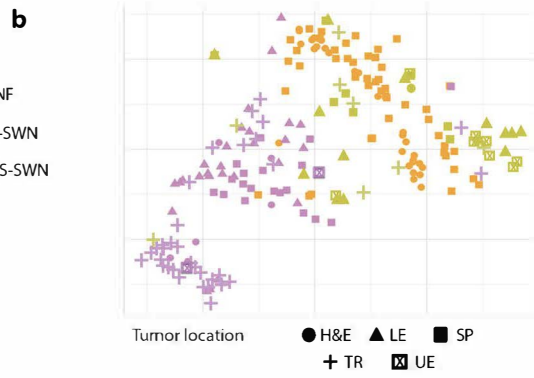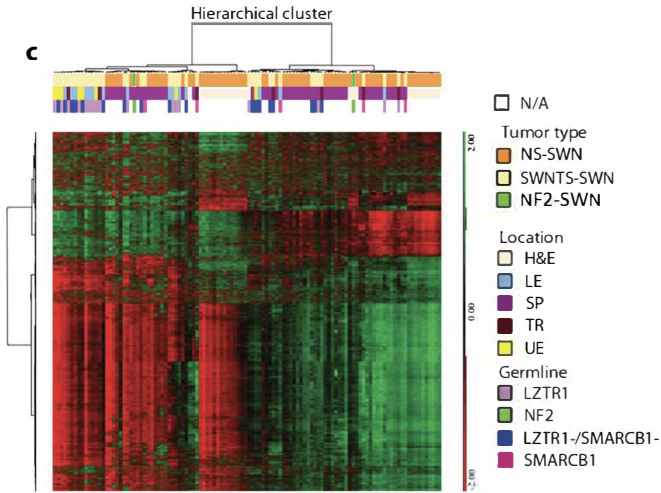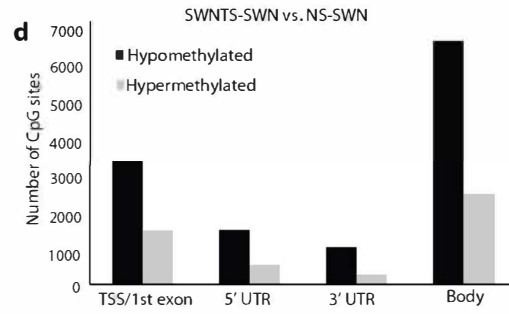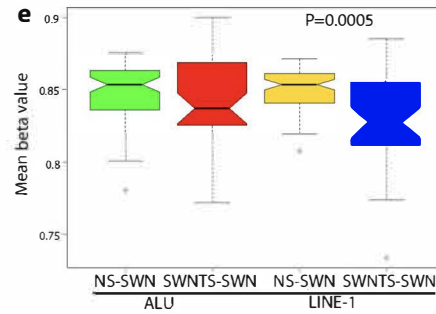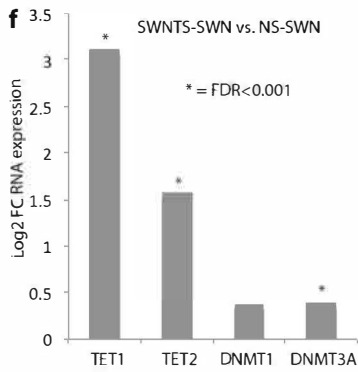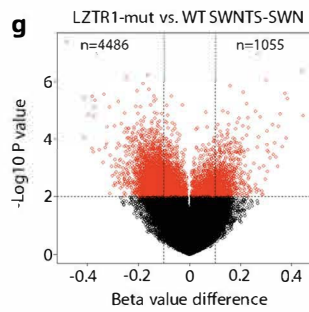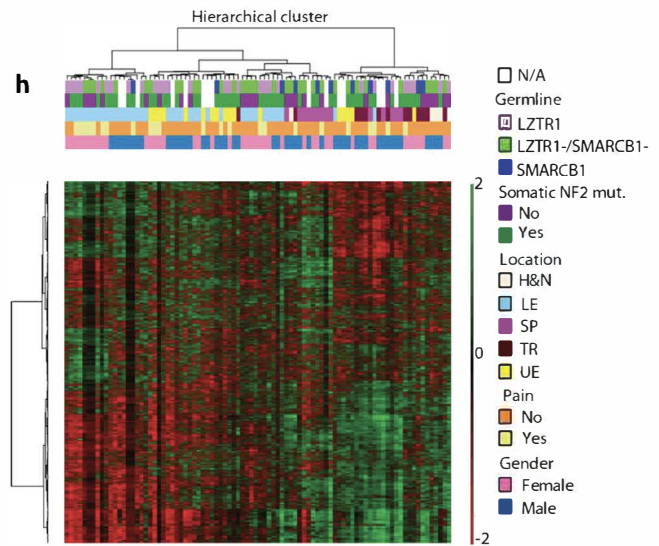

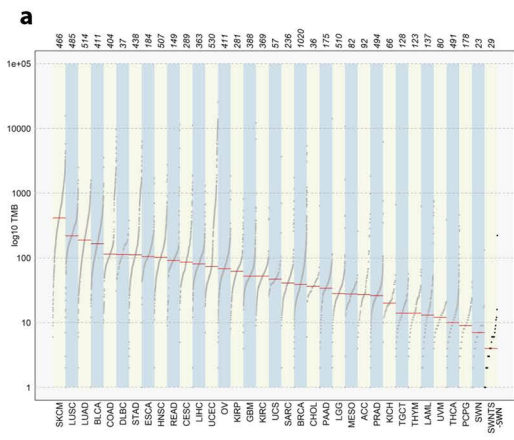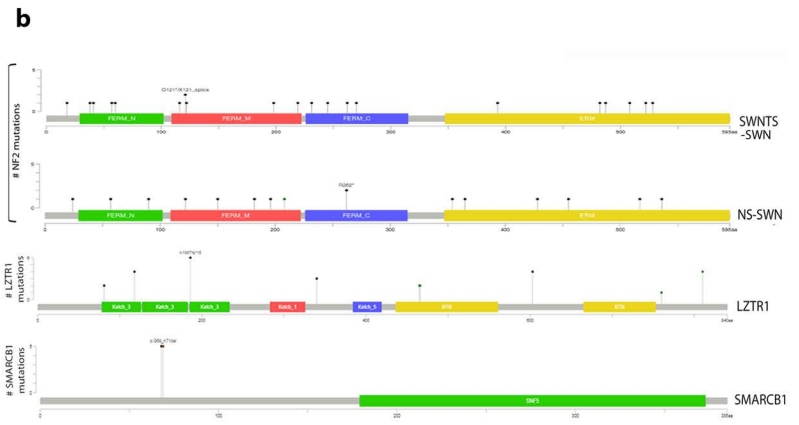

Whole genome (SWNTS-SWN)

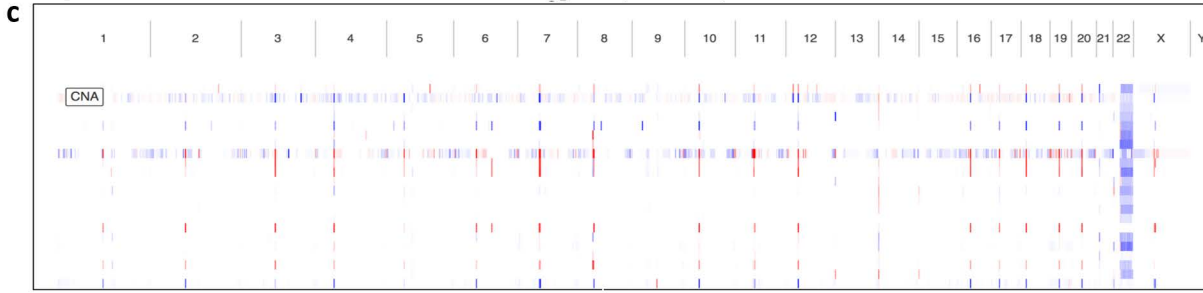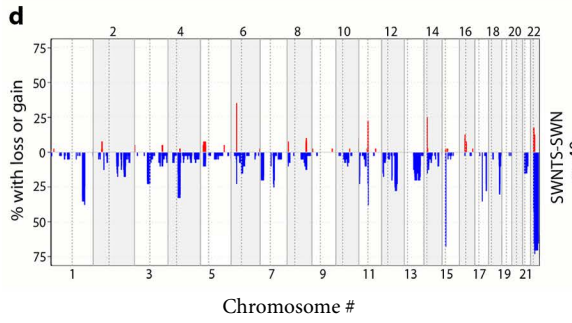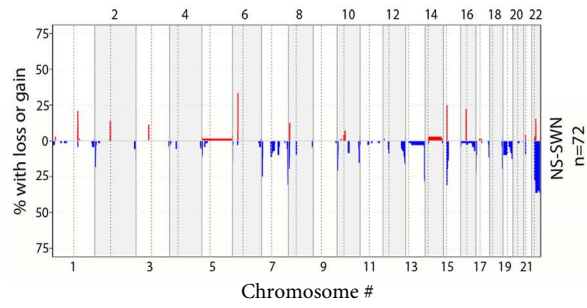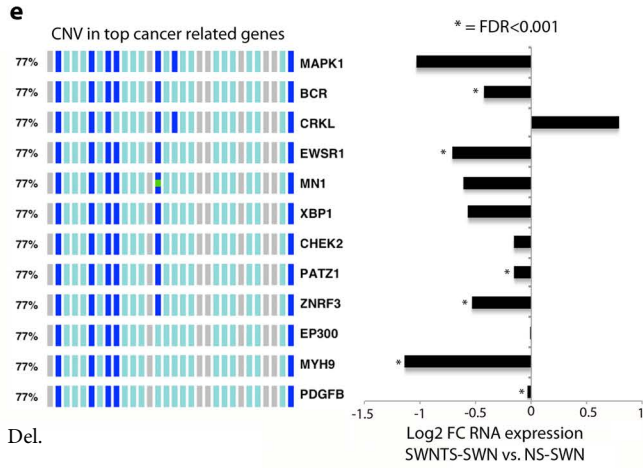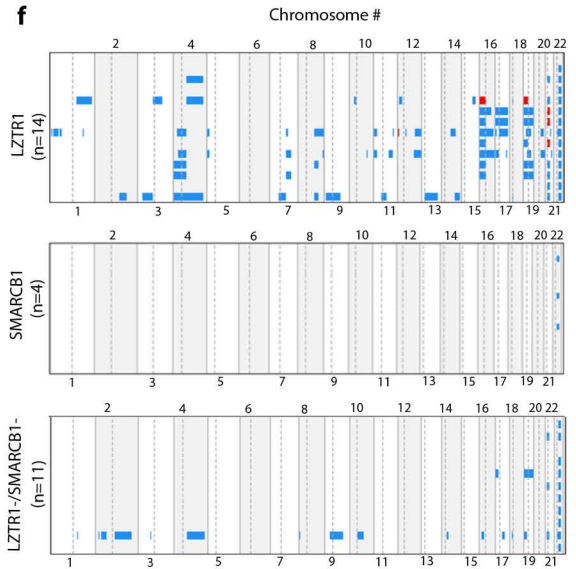

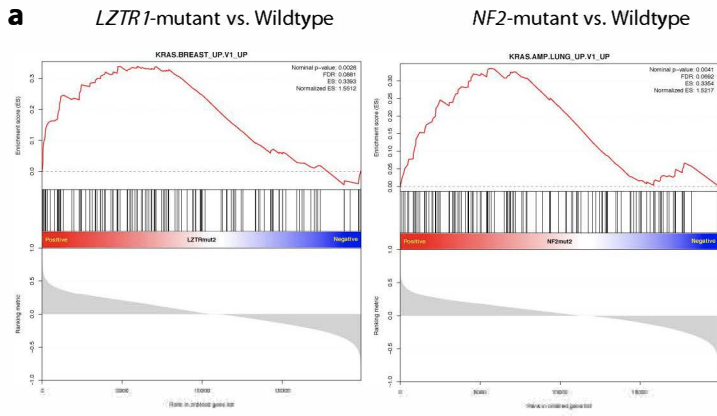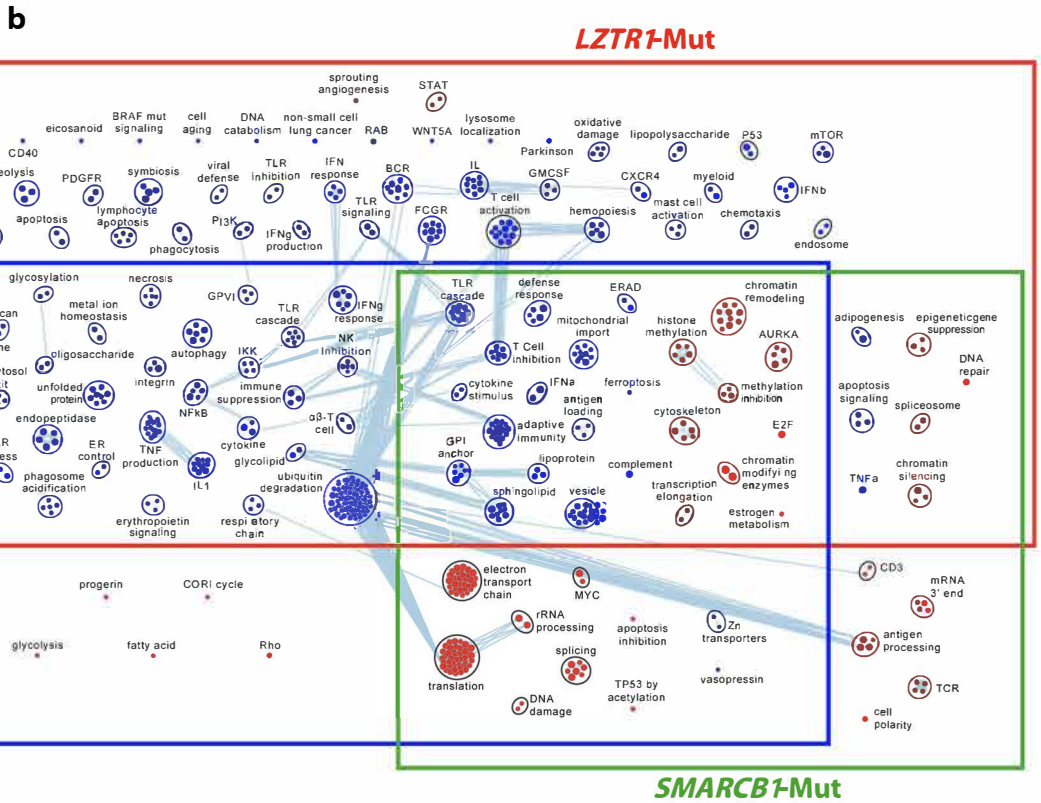

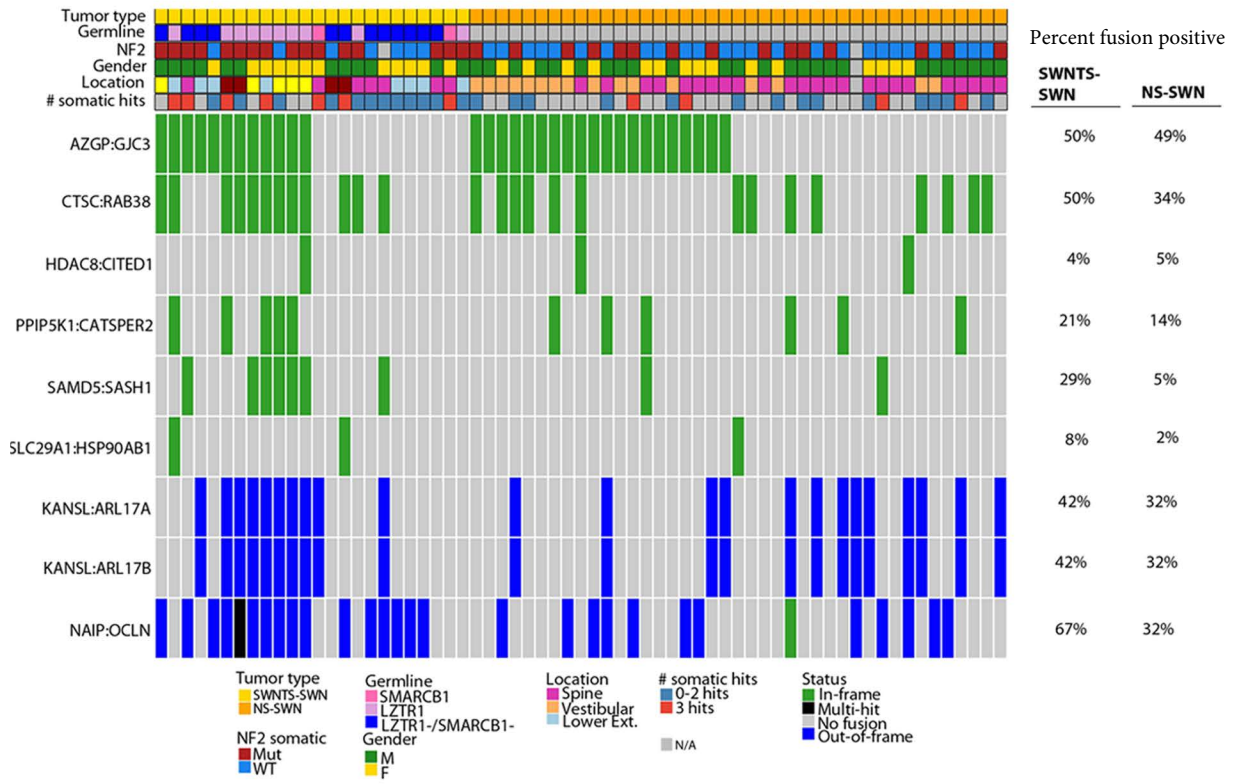



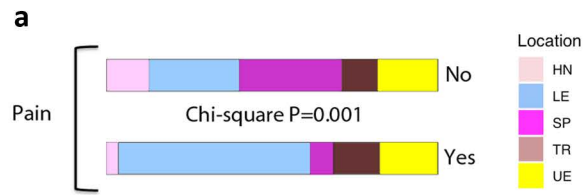

**b**

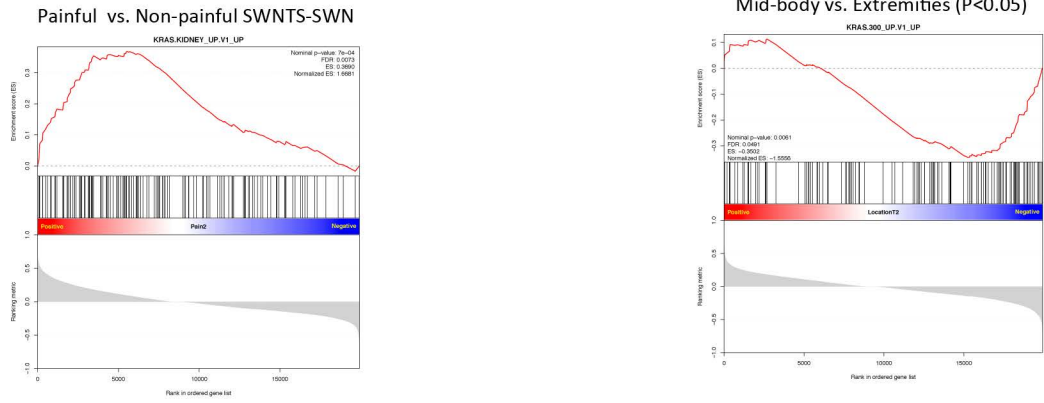

**c**

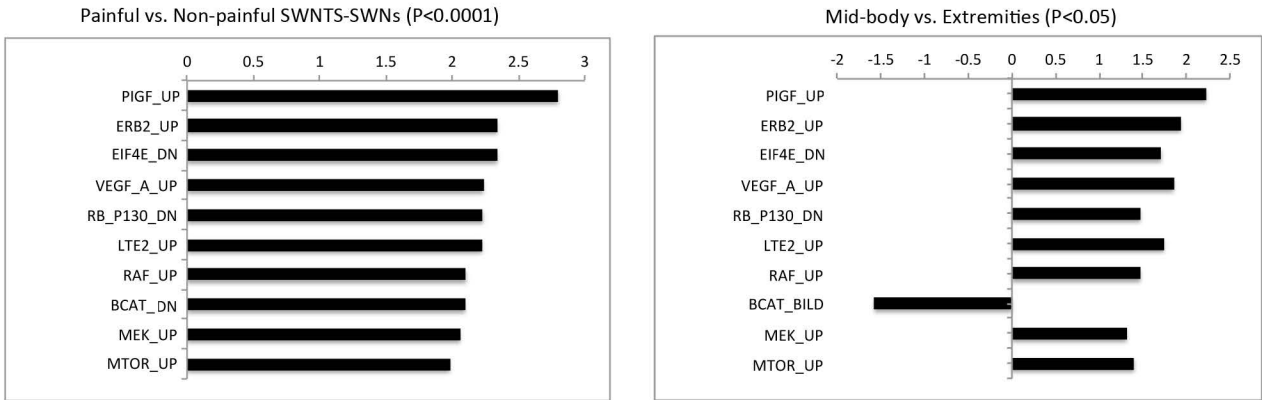

**d**

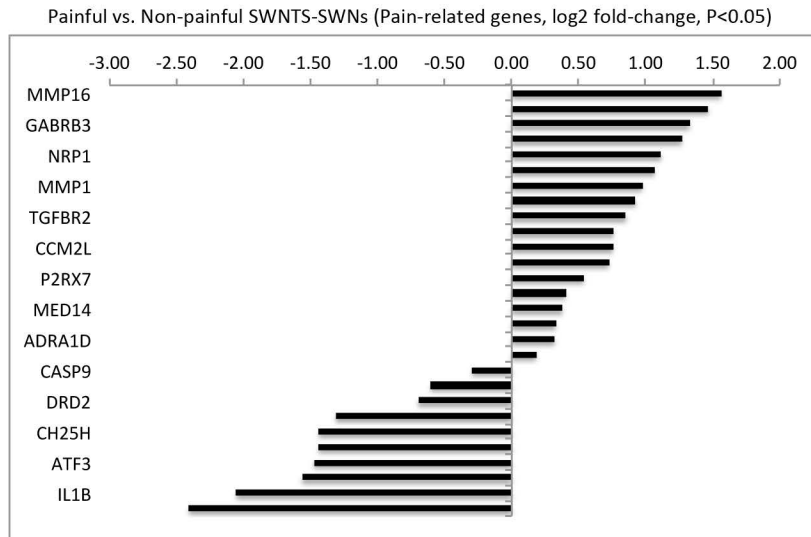

# 1 Online Resource Tables

## 2 Online resource table 1. Description of the cohort and molecular profiling platforms

| Patient ID | Tumor ID | Center | LZTR1+, SMARCB1 + | Location | Gender | Family history | Tissue (frozen/ FFPE) | NF2 (Somatic, Sanger) | 22q LOH | Fusion (SH3P XD2A-HTRA1 ) | Pain | Meth | WGS | WES | RNAseq | RT-PCR |
|------------|----------|--------|-------------------|----------|--------|----------------|-----------------------|-----------------------|---------|---------------------------|------|------|-----|-----|--------|--------|
| 1          | 11       | UF     | SMARCB1           | LE       | M      | Sporadic       | frozen                | y                     | Y       | N                         | Y    | Y    | Y   | Y   | N      | N      |
| 1          | 8        | UF     | SMARCB1           | TR       | M      | Sporadic       | frozen                | N                     | N       | N                         | Y    | Y    | N   | Y   | N      | N      |
| 1          | 10       | UF     | SMARCB1           | TR       | M      | Sporadic       | frozen                | N                     | N       | N                         | Y    | Y    | N   | Y   | N      | N      |
| 1          | 9        | UF     | SMARCB1           | TR       | M      | Sporadic       | frozen                | y                     | Y       | N                         | Y    | N    | Y   | Y   | N      | N      |
| 2          | 12       | UF     | LZTR1             | TR       | F      | Sporadic       | frozen                | N                     | Y       | N                         | Y    | N    | N   | Y   | N      | N      |
| 2          | 13       | UF     | LZTR1             | TR       | F      | Sporadic       | frozen                | y                     | Y       | N                         | Y    | Y    | N   | Y   | N      | N      |
| 3          | 32       | UF     | LZTR1             | LE       | M      | Familial       | frozen                | y                     | N       | N                         | N/A  | Y    | Y   | Y   | Y      | N      |
| 3          | 143      | UF     | LZTR1             | SP       | M      | Familial       | FFPE                  | y                     | N/A     | N                         | N/A  | N    | N   | N   | N      | N      |
| 4          | 28       | UF     | LZTR1             | LE       | M      | Sporadic       | FFPE                  | N                     | Y       | N                         | Y    | Y    | N   | Y   | N      | Y      |
| 4          | 144      | UF     | LZTR1             | LE       | M      | Sporadic       | FFPE                  | N/A                   | N/A     | Y                         | N/A  | N    | N   | N   | N      | N      |
| 4          | 27       | UF     | LZTR1             | SP       | M      | Sporadic       | FFPE                  | y                     | Y       | Y                         | Y    | N    | N   | N   | N      | Y      |
| 5          | 114      | UF     | neg               | HN       | M      | Sporadic       | FFPE                  | N/A                   | N/A     | N/A                       | N    | N    | N   | N   | N      | Y      |
| 5          | 113      | UF     | neg               | UE       | M      | Sporadic       | FFPE                  | N/A                   | N/A     | N/A                       | N    | N    | N   | N   | N      | Y      |
| 6          | 40       | UF     | neg               | LE       | F      | Sporadic       | FFPE                  | N                     | Y       | N                         | N/A  | Y    | N   | N   | N      | N      |
| 6          | 41       | UF     | neg               | LE       | F      | Sporadic       | FFPE                  | N                     | Y       | N                         | N/A  | Y    | N   | N   | N      | N      |
| 6          | 15       | UF     | neg               | LE       | F      | Sporadic       | frozen                | N                     | Y       | N                         | N/A  | Y    | N   | N   | N      | N      |
| 6          | 42       | UF     | neg               | LE       | F      | Sporadic       | FFPE                  | N                     | N/A     | N                         | N/A  | Y    | N   | N   | N      | N      |
| 6          | 14       | UF     | neg               | LE       | F      | Sporadic       | frozen                | N                     | Y       | N                         | N/A  | Y    | N   | Y   | N      | N      |
| 7          | 16       | UF     | neg               | UE       | M      | Sporadic       | frozen                | y                     | Y       | N                         | N    | Y    | Y   | Y   | N      | N      |
| 8          | 21       | UF     | neg               | SP       | F      | Sporadic       | frozen                | N                     | Y       | N                         | N/A  | Y    | N   | N   | N      | N      |
| 8          | 30       | UF     | neg               | UE       | F      | Sporadic       | frozen                | y                     | Y       | N                         | Y    | Y    | Y   | Y   | N      | N      |
| 9          | 20       | UF     | LZTR1             | LE       | F      | Sporadic       | FFPE                  | N                     | Y       | N                         | Y    | N    | N   | N   | N      | Y      |
| 9          | 19       | UF     | LZTR1             | LE       | F      | Sporadic       | FFPE                  | N                     | Y       | N                         | Y    | Y    | N   | N   | N      | Y      |
| 9          | 18       | UF     | LZTR1             | LE       | F      | Sporadic       | FFPE                  | y                     | Y       | N                         | Y    | Y    | N   | N   | N      | Y      |
| 9          | 17       | UF     | LZTR1             | LE       | F      | Sporadic       | FFPE                  | y                     | Y       | N/A                       | Y    | N    | N   | N   | N      | Y      |
| 9          | 145      | UF     | LZTR1             | LE       | F      | Sporadic       | FFPE                  | y                     | Y       | Y                         | N/A  | N    | N   | N   | N      | N      |
| 10         | 109      | UF     | LZTR1             | LE       | F      | Sporadic       | frozen                | y                     | Y       | N                         | Y    | Y    | N   | Y   | Y      | N      |
| 10         | 111      | UF     | LZTR1             | UE       | F      | Sporadic       | frozen                | y                     | N/A     | N                         | Y    | Y    | N   | Y   | Y      | N      |
| 10         | 112      | UF     | LZTR1             | UE       | F      | Sporadic       | frozen                | y                     | N/A     | N                         | Y    | Y    | N   | Y   | Y      | N      |
| 10         | 110      | UF     | LZTR1             | UE       | F      | Sporadic       | frozen                | N                     | Y       | N                         | Y    | Y    | Y   | Y   | Y      | N      |

|    |     |    |         |    |   |          |        |     |     |     |     |   |   |   |   |   |
|----|-----|----|---------|----|---|----------|--------|-----|-----|-----|-----|---|---|---|---|---|
| 10 | 108 | UF | LZTR1   | UE | F | Sporadic | frozen | y   | N/A | N   | Y   | Y | Y | Y | Y | N |
| 11 | 25  | UF | SMARCB1 | LE | F | Sporadic | FFPE   | N   | Y   | N   | N   | Y | N | N | N | Y |
| 11 | 26  | UF | SMARCB1 | TR | F | Sporadic | FFPE   | y   | Y   | N   | N/A | Y | N | N | N | Y |
| 12 | 23  | UF | LZTR1   | TR | F | Sporadic | FFPE   | y   | Y   | Y   | N/A | Y | N | N | N | N |
| 12 | 22  | UF | LZTR1   | UE | F | Sporadic | FFPE   | N   | Y   | N   |     | N | N | N | N | N |
| 13 | 96  | UF | LZTR1   | SP | F | Familial | FFPE   | y   | Y   | N   | Y   | N | N | N | N | Y |
| 14 | 97  | UF | LZTR1   | LE | M | Familial | FFPE   | y   | Y   | Y   | Y   | N | N | N | N | Y |
| 14 | 146 | UF | LZTR1   | SP | M | Familial | FFPE   | y   | Y   | N   | N/A | N | N | N | N | N |
| 15 | 37  | UF | LZTR1   | HN | M | Familial | FFPE   | y   | Y   | N   | N   | N | N | N | N | Y |
| 15 | 36  | UF | LZTR1   | SP | M | Familial | FFPE   | y   | Y   | N   | N   | N | N | N | N | Y |
| 15 | 38  | UF | LZTR1   | TR | M | Familial | FFPE   | y   | Y   | Y   | N   | N | N | N | N | Y |
| 16 | 24  | UF | neg     | TR | F | Sporadic | FFPE   | N   | N   | N   | N/A | N | N | N | N | N |
| 17 | 39  | UF | SMARCB1 | LE | F | Familial | FFPE   | y   | Y   | N   | Y   | N | N | N | N | Y |
| 17 | 31  | UF | SMARCB1 | SP | F | Familial | frozen | y   | Y   | N   | N   | Y | Y | Y | Y | N |
| 18 | 45  | UF | neg     | HN | F | Sporadic | FFPE   | N   | Y   | N   | N/A | N | N | N | N | N |
| 18 | 44  | UF | neg     | LE | F | Sporadic | FFPE   | y   | Y   | N   | Y   | Y | N | N | N | Y |
| 18 | 43  | UF | neg     | TR | F | Sporadic | FFPE   | N   | Y   | N   | N/A | Y | N | N | N | N |
| 19 | 29  | UF | neg     | SP | M | Sporadic | frozen | y   | N   | N   | N/A | Y | Y | Y | Y | N |
| 20 | 61  | UF | LZTR1   | SP | M | Sporadic | FFPE   | y   | Y   | N   | N   | N | N | N | N | Y |
| 20 | 147 | UF | LZTR1   | SP | M | Sporadic | FFPE   | y   | Y   | Y   | N/A | N | N | N | N | N |
| 21 | 53  | UF | LZTR1   | LE | M | Sporadic | FFPE   | y   | Y   | N   | Y   | N | N | N | N | N |
| 21 | 55  | UF | LZTR1   | LE | M | Sporadic | FFPE   | y   | Y   | N   | Y   | Y | N | N | N | Y |
| 21 | 54  | UF | LZTR1   | LE | M | Sporadic | FFPE   | N/A | N/A | N   | Y   | N | N | N | N | Y |
| 21 | 50  | UF | LZTR1   | LE | M | Familial | FFPE   | N   | Y   | Y   | Y   | N | N | N | N | Y |
| 21 | 49  | UF | LZTR1   | LE | M | Familial | FFPE   | y   | Y   | Y   | Y   | N | N | N | N | Y |
| 21 | 52  | UF | LZTR1   | LE | M | Familial | FFPE   | N   | N/A | Y   | Y   | N | N | N | N | Y |
| 21 | 51  | UF | LZTR1   | LE | M | Familial | FFPE   | N   | N/A | N/A | Y   | N | N | N | N | Y |
| 21 | 149 | UF | LZTR1   | LE | M | Familial | FFPE   | N   | Y   | N   | N/A | N | N | N | N | N |
| 21 | 148 | UF | LZTR1   | LE | M | Familial | FFPE   | N   | Y   | Y   | N/A | N | N | N | N | N |
| 22 | 92  | UF | SMARCB1 | SP | F | Sporadic | FFPE   | y   | Y   | N   | N   | Y | N | N | N | Y |
| 22 | 91  | UF | SMARCB1 | TR | F | Sporadic | FFPE   | N   | N/A | N   | N   | Y | N | N | N | Y |
| 22 | 93  | UF | SMARCB1 | UE | F | Sporadic | FFPE   | y   | N/A | N   | N   | Y | N | N | N | Y |
| 23 | 46  | UF | LZTR1   | LE | M | Sporadic | FFPE   | y   | Y   | N   | N   | Y | N | N | N | Y |
| 23 | 48  | UF | LZTR1   | LE | M | Sporadic | FFPE   | N   | N/A | N   | N   | N | N | N | N | Y |
| 23 | 47  | UF | LZTR1   | LE | M | Sporadic | FFPE   | y   | Y   | N   | N   | Y | N | N | N | Y |
| 24 | 73  | UF | neg     | HN | M | Sporadic | FFPE   | N   | N   | N   | N/A | N | N | N | N | Y |

|    |     |    |         |    |   |          |        |     |     |   |     |   |   |   |   |   |
|----|-----|----|---------|----|---|----------|--------|-----|-----|---|-----|---|---|---|---|---|
| 24 | 72  | UF | neg     | SP | M | Sporadic | FFPE   | y   | Y   | Y | N/A | N | N | N | N | Y |
| 25 | 56  | UF | neg     | SP | F | Sporadic | frozen | y   | N   | N | N   | Y | Y | Y | N | N |
| 26 | 59  | UF | SMARCB1 | UE | F | Familial | FFPE   | y   | Y   | N | Y   | N | N | N | N | Y |
| 27 | 87  | UF | LZTR1   | HN | F | Sporadic | FFPE   | N   | Y   | N | N   | Y | N | N | N | Y |
| 27 | 88  | UF | LZTR1   | UE | F | Sporadic | FFPE   | y   | Y   | N | N   | Y | N | Y | N | Y |
| 28 | 63  | UF | LZTR1   | LE | F | Sporadic | frozen | y   | N   | N | Y   | Y | N | N | N | N |
| 28 | 62  | UF | LZTR1   | LE | F | Sporadic | frozen | y   | Y   | N | Y   | Y | N | N | N | N |
| 28 | 64  | UF | LZTR1   | LE | F | Sporadic | frozen | y   | Y   | N | Y   | Y | N | N | N | N |
| 28 | 65  | UF | LZTR1   | LE | F | Sporadic | frozen | y   | Y   | N | Y   | Y | N | N | N | N |
| 28 | 76  | UF | LZTR1   | LE | F | Sporadic | FFPE   | y   | Y   | N | N   | Y | N | N | N | Y |
| 28 | 77  | UF | LZTR1   | LE | F | Sporadic | FFPE   | y   | Y   | N | N   | Y | N | N | N | Y |
| 28 | 80  | UF | LZTR1   | LE | F | Sporadic | FFPE   | y   | Y   | N | Y   | N | N | N | N | Y |
| 28 | 78  | UF | LZTR1   | LE | F | Sporadic | FFPE   | y   | Y   | Y | Y   | N | N | N | N | Y |
| 28 | 79  | UF | LZTR1   | LE | F | Sporadic | FFPE   | y   | Y   | Y | Y   | N | N | N | N | Y |
| 29 | 66  | UF | neg     | LE | M | Sporadic | FFPE   | N/A | N/A | N | N/A | N | N | N | N | Y |
| 30 | 67  | UF | LZTR1   | HN | M | Sporadic | FFPE   | y   | N/A | N | N   | N | N | N | N | Y |
| 31 | 68  | UF | neg     | HN | M | Sporadic | FFPE   | N   | N   | N | N   | Y | N | N | N | Y |
| 31 | 69  | UF | neg     | HN | M | Sporadic | FFPE   | N   | Y   | N | N   | Y | N | N | N | Y |
| 31 | 70  | UF | neg     | HN | M | Sporadic | FFPE   | N   | Y   | N | N   | Y | N | Y | N | Y |
| 31 | 71  | UF | neg     | SP | M | Sporadic | FFPE   | N   | Y   | N | N   | Y | N | N | N | Y |
| 32 | 75  | UF | neg     | LE | M | Sporadic | FFPE   | y   | Y   | N | N   | Y | N | Y | N | Y |
| 32 | 74  | UF | neg     | TR | M | Sporadic | FFPE   | N   | Y   | N | N   | Y | N | N | N | Y |
| 33 | 102 | UF | neg     | LE | M | Sporadic | frozen | y   | Y   | N | N   | Y | N | Y | N | N |
| 33 | 94  | UF | neg     | LE | M | Sporadic | FFPE   | y   | Y   | N | N   | Y | N | N | N | Y |
| 34 | 81  | UF | neg     | LE | M | Sporadic | frozen | N   | Y   | N | N/A | Y | N | Y | N | N |
| 35 | 83  | UF | LZTR1   | SP | F | Sporadic | FFPE   | N/A | N/A | N | N   | N | N | N | N | Y |
| 35 | 82  | UF | LZTR1   | SP | F | Sporadic | FFPE   | N   | N/A | Y | N   | N | N | N | N | Y |
| 36 | 100 | UF | LZTR1   | UE | M | Familial | FFPE   | y   | Y   | N | Y   | Y | N | N | N | N |
| 37 | 85  | UF | neg     | LE | F | Sporadic | FFPE   | N/A | N/A | N | Y   | N | N | N | N | Y |
| 37 | 86  | UF | neg     | LE | F | Sporadic | FFPE   | N/A | N/A | N | Y   | N | N | N | N | Y |
| 37 | 84  | UF | neg     | TR | F | Sporadic | FFPE   | N/A | N/A | N | Y   | N | N | N | N | Y |
| 38 | 90  | UF | LZTR1   | TR | M | Sporadic | frozen | y   | N   | N | N/A | Y | Y | N | Y | N |
| 38 | 89  | UF | LZTR1   | TR | M | Sporadic | frozen | y   | Y   | N | N/A | Y | N | Y | Y | N |
| 39 | 6   | UF | LZTR1   | HN | M | Sporadic | frozen | y   | Y   | N | N/A | Y | N | Y | N | N |
| 39 | 95  | UF | LZTR1   | LE | M | Sporadic | frozen | y   | Y   | N | N/A | Y | Y | Y | N | N |
| 40 | 106 | UF | SMARCB1 | UE | M | Sporadic | FFPE   | y   | Y   | N |     | Y | N | N | N | N |

|    |     |           |         |     |   |          |        |     |     |     |     |   |   |   |   |   |
|----|-----|-----------|---------|-----|---|----------|--------|-----|-----|-----|-----|---|---|---|---|---|
| 41 | 105 | UF        | neg     | UE  | M | Sporadic | frozen | y   | Y   | N   | N/A | Y | N | Y | N | N |
| 41 | 103 | UF        | neg     | N/A | M | Sporadic | FFPE   | N/A | N/A | N   | N/A | N | N | N | N | Y |
| 41 | 104 | UF        | neg     | N/A | M | Sporadic | FFPE   | N/A | N/A | N   | N/A | N | N | N | N | Y |
| 42 | 101 | UF        | LZTR1   | UE  | F | Familial | FFPE   | N   | N/A | N   | N/A | N | N | N | N | Y |
| 43 | 150 | UF        | neg     | HN  | M | Sporadic | FFPE   | N   | Y   | Y   | N/A | N | N | N | N | N |
| 43 | 107 | UF        | neg     | SP  | M | Sporadic | FFPE   | N   | N   | Y   | N/A | N | N | N | N | N |
| 44 | 98  | UF        | LZTR1   | TR  | F | Sporadic | FFPE   | N/A | N/A | N/A | Y   | N | N | N | N | Y |
| 44 | 99  | UF        | LZTR1   | TR  | F | Sporadic | FFPE   | N/A | N/A | N/A | Y   | N | N | N | N | Y |
| 45 | 141 | UF        | neg     | LE  | M | Sporadic | frozen | y   | N   | N/A | N   | N | Y | N | N | N |
| 45 | 139 | UF        | neg     | UE  | M | Sporadic | frozen | y   | Y   | N/A | Y   | N | Y | N | N | N |
| 45 | 140 | UF        | neg     | UE  | M | Sporadic | frozen | y   | Y   | N/A | Y   | N | Y | N | N | N |
| 46 | 142 | UF        | SMARCB1 | LE  | F | Familial | frozen | N/A | N/A | N/A | Y   | N | Y | N | N | N |
| 47 | 7   | UF        | neg     | LE  | F | Sporadic | frozen | y   | Y   | N   | N/A | Y | N | Y | N | N |
| 47 | 151 | UF        | neg     | UE  | F | Sporadic | FFPE   | N/A | N/A | N   | N/A | N | N | N | N | N |
| 48 | 34  | UF        | SMARCB1 | HN  | F | Familial | FFPE   | y   | Y   | Y   | Y   | N | N | N | N | Y |
| 48 | 33  | UF        | SMARCB1 | HN  | F | Familial | FFPE   | N/A | N/A | N/A | Y   | N | N | N | N | Y |
| 48 | 152 | UF        | SMARCB1 | TR  | F | Familial | FFPE   | y   | N/A | N   | N/A | N | N | N | N | N |
| 48 | 35  | UF        | SMARCB1 | N/A | F | Familial | FFPE   | N/A | Y   | N   | Y   | N | N | N | N | Y |
| 49 | 58  | UF        | SMARCB1 | SP  | F | Familial | FFPE   | y   | Y   | N   | N   | N | N | N | N | Y |
| 49 | 57  | UF        | SMARCB1 | SP  | F | Familial | FFPE   | N/A | N/A | N   | N   | N | N | N | N | Y |
| 49 | 153 | UF        | SMARCB1 | TR  | F | Familial | FFPE   | N   | Y   | Y   | N/A | N | N | N | N | N |
| 50 | 60  | UF        | SMARCB1 | SP  | M | Familial | FFPE   | N   | Y   | N   | N   | N | N | N | N | Y |
| 50 | 154 | UF        | SMARCB1 | TR  | M | Familial | FFPE   | N   | Y   | N   | N/A | N | N | N | N | N |
| 50 | 155 | UF        | SMARCB1 | TR  | M | Familial | FFPE   | N   | Y   | N   | N/A | N | N | N | N | N |
| 51 | 1   | Argentina | neg     | LE  | F | Sporadic | frozen | N   | N   | N   | Y   | Y | N | Y | Y | N |
| 51 | 2   | Argentina | neg     | LE  | F | Sporadic | frozen | N   | N   | N   | Y   | Y | N | Y | Y | N |
| 51 | 3   | Argentina | neg     | LE  | F | Sporadic | frozen | N   | N   | N   | Y   | Y | N | Y | Y | N |
| 51 | 4   | Argentina | neg     | LE  | F | Sporadic | frozen | N   | N   | N   | Y   | Y | N | Y | Y | N |
| 52 | 117 | UHN       | LZTR1   | LE  | M | Sporadic | FFPE   | N/A | N/A | N   | N   | Y | N | N | N | N |
| 52 | 119 | UHN       | LZTR1   | LE  | M | Sporadic | frozen | y   | Y   | N   | Y   | Y | N | Y | Y | N |
| 53 | 132 | UHN       | neg     | LE  | M | Sporadic | FFPE   | N/A | N/A | N   | Y   | N | N | N | N | N |
| 53 | 115 | UHN       | neg     | UE  | M | Sporadic | FFPE   | N/A | N/A | N   | N   | Y | N | N | N | N |
| 53 | 130 | UHN       | neg     | UE  | M | Sporadic | FFPE   | N/A | N/A | N   | Y   | Y | N | N | N | N |
| 54 | 127 | UHN       | neg     | SP  | M | Sporadic | FFPE   | N/A | Y   | N   | N   | Y | N | N | N | N |
| 54 | 131 | UHN       | neg     | SP  | M | Sporadic | FFPE   | N/A | Y   | N   | N   | Y | N | N | N | N |
| 54 | 129 | UHN       | neg     | SP  | M | Sporadic | FFPE   | N/A | N/A | N   | N   | Y | N | N | N | N |

|    |     |     |         |     |   |          |        |     |     |     |     |   |   |   |   |   |
|----|-----|-----|---------|-----|---|----------|--------|-----|-----|-----|-----|---|---|---|---|---|
| 54 | 135 | UHN | LZTR1   | SP  | M | Sporadic | frozen | y   | N   | N   | N   | Y | Y | Y | Y | N |
| 55 | 122 | UHN | neg     | SP  | M | Sporadic | frozen | y   | Y   | N   | N   | Y | N | Y | Y | N |
| 55 | 118 | UHN | neg     | UE  | M | Sporadic | frozen | y   | N/A | N   | N   | Y | N | Y | Y | N |
| 56 | 126 | UHN | neg     | UE  | F | Sporadic | FFPE   | N/A | Y   | N   | N   | Y | N | N | N | N |
| 57 | 124 | UHN | neg     | LE  | M | Sporadic | FFPE   | N/A | N/A | N   | N   | Y | N | N | N | N |
| 57 | 137 | UHN | neg     | UE  | M | Sporadic | FFPE   | N/A | Y   | N   | N   | Y | N | N | N | N |
| 58 | 138 | UHN | neg     | UE  | M | Sporadic | FFPE   | N/A | Y   | N   | N   | Y | N | N | N | N |
| 58 | 134 | UHN | neg     | UE  | M | Sporadic | FFPE   | N/A | N/A | N   | N   | Y | N | N | N | N |
| 59 | 136 | UHN | neg     | SP  | M | Sporadic | frozen | N   | Y   | N   | Y   | Y | Y | Y | Y | N |
| 60 | 5   | UHN | neg     | SP  | F | Sporadic | frozen | N/A | N   | N   | N   | Y | N | N | Y | N |
| 61 | 128 | UHN | neg     | LE  | M | Sporadic | FFPE   | N/A | Y   | N   | N   | Y | N | N | N | N |
| 61 | 116 | UHN | neg     | LE  | M | Sporadic | FFPE   | N/A | N/A | N   | N   | Y | N | N | N | N |
| 62 | 120 | UHN | SMARCB1 | SP  | F | Sporadic | frozen | y   | Y   | N   | Y   | Y | N | Y | Y | N |
| 63 | 123 | UHN | neg     | LE  | M | Sporadic | frozen | y   | N/A | N   | N   | Y | Y | Y | Y | N |
| 63 | 133 | UHN | neg     | TR  | M | Sporadic | FFPE   | N/A | N/A | N   | N   | Y | N | N | N | N |
| 64 | 125 | UHN | neg     | TR  | M | Sporadic | frozen | y   | Y   | N   | N   | Y | Y | Y | Y | N |
| 64 | 121 | UHN | neg     | TR  | M | Sporadic | frozen | N   | N/A | N   | N   | Y | Y | Y | Y | N |
| 65 | 156 | UF  | LZTR1   | SP  | M | Sporadic | FFPE   | y   | N/A | N   | N/A | N | N | N | N | N |
| 65 | 157 | UF  | LZTR1   | SP  | M | Sporadic | FFPE   | y   | N/A | Y   | N/A | N | N | N | N | N |
| 66 | 158 | UF  | neg     | HN  | M | Familial | FFPE   | N   | Y   | N   | N/A | N | N | N | N | N |
| 67 | 159 | UF  | neg     | LE  | M | Sporadic | FFPE   | y   | N/A | N   | N/A | N | N | N | N | N |
| 68 | 160 | UF  | LZTR1   | SP  | F | Sporadic | FFPE   | N/A | N/A | N   | N/A | N | N | N | N | N |
| 68 | 161 | UF  | LZTR1   | SP  | F | Sporadic | FFPE   | N/A | N/A | N   | N/A | N | N | N | N | N |
| 69 | 162 | UF  | neg     | SP  | M | Sporadic | FFPE   | N/A | N/A | Y   | N/A | N | N | N | N | N |
| 70 | 163 | UF  | neg     | N/A | F | Familial | FFPE   | N/A | N/A | Y   | N/A | N | N | N | N | N |
| 71 | 164 | UF  | neg     | SP  | F | Sporadic | FFPE   | N   | N/A | N   | N/A | N | N | N | N | N |
| 72 | 165 | UF  | LZTR1   | N/A | M | Familial | FFPE   | N/A | N/A | N/A | N/A | N | N | N | N | N |

### 3 Online resource table 2. Top 50 differentially methylated CpGs in SWNTS-SWNs vs. NS-SWNs

| ID         | CHR | Gene Symbol | RELATION_TO_UCSC_CPG_ISLAND | UCSC_REFGENE_GROUP.0 | Pvalue   | pp.adj   | Mean diff (SWN-SWNTS) |
|------------|-----|-------------|-----------------------------|----------------------|----------|----------|-----------------------|
| cg09698465 | 12  |             | Island                      |                      | 1.41E-32 | 1.18E-30 | 0.609206              |
| cg22876699 | 3   |             |                             |                      | 8.14E-98 | 3.64E-94 | 0.609195              |
| cg02154531 | X   | NHSL2       | N_Shore                     | Body                 | 3.20E-75 | 3.27E-72 | 0.608366              |
| cg26175287 | 14  | C14orf139   |                             | TSS1500              | 1.19E-89 | 3.01E-86 | 0.597191              |
| cg10506618 | 3   | TRAK1       | S_Shelf                     | Body                 | 1.61E-87 | 3.39E-84 | 0.584945              |
| cg05128056 | 15  |             | N_Shore                     |                      | 9.93E-72 | 8.32E-69 | 0.561456              |
| cg13851870 | 19  | CCDC124     | Island                      | 5'UTR                | 1.98E-87 | 4.12E-84 | 0.561247              |

|            |    |          |         |         |           |           |          |
|------------|----|----------|---------|---------|-----------|-----------|----------|
| cg17189020 | 17 | ATP2A3   | S_Shore | Body    | 2.69E-57  | 1.04E-54  | 0.550251 |
| cg25152348 | 22 | NCAPH2   | Island  | 1stExon | 7.32E-90  | 1.88E-86  | 0.533018 |
| cg12026095 | 19 | FTL      | Island  | TSS200  | 3.83E-108 | 4.26E-104 | 0.525319 |
| cg13003239 | 3  | WDR6     | Island  | TSS200  | 2.76E-108 | 3.32E-104 | 0.522194 |
| cg08206623 | 11 | CDKN1C   | Island  | TSS1500 | 8.85E-76  | 9.29E-73  | 0.514188 |
| cg03479491 | 22 | TTL8     | N_Shore | TSS1500 | 3.40E-90  | 8.93E-87  | 0.510783 |
| cg00769882 | 1  | HSPA6    | N_Shore | TSS1500 | 1.80E-49  | 4.60E-47  | 0.504404 |
| cg27196695 | 10 | INPP5A   |         | Body    | 3.00E-48  | 7.15E-46  | 0.497984 |
| cg03543448 | 16 | GLIS2    |         | Body    | 4.21E-54  | 1.37E-51  | 0.496372 |
| cg06669598 | 6  | ECHDC1   |         | 3'UTR   | 2.21E-60  | 1.00E-57  | 0.496009 |
| cg13525026 | 17 | MYO15A   |         | Body    | 1.33E-60  | 6.12E-58  | 0.494059 |
| cg16646879 | 16 |          | N_Shore |         | 9.66E-79  | 1.16E-75  | 0.483687 |
| cg20144008 | 2  |          | Island  |         | 1.36E-83  | 2.31E-80  | 0.480808 |
| cg12416290 | 3  |          |         |         | 4.31E-106 | 3.91E-102 | 0.480693 |
| cg07060261 | 13 |          |         |         | 8.71E-89  | 2.01E-85  | 0.480298 |
| cg01938825 | 7  |          |         |         | 1.50E-29  | 9.98E-28  | 0.478751 |
| cg01684248 | 16 |          | N_Shelf |         | 1.12E-75  | 1.17E-72  | 0.468001 |
| cg07576219 | 1  | ACOT11   | S_Shelf | TSS1500 | 5.34E-69  | 3.85E-66  | 0.466562 |
| cg20149170 | 1  | EPHB2    |         | Body    | 2.04E-40  | 2.99E-38  | 0.464245 |
| cg18048953 | 12 |          | N_Shelf |         | 1.71E-74  | 1.69E-71  | 0.453483 |
| cg26651188 | 12 | LPCAT3   |         | Body    | 3.87E-46  | 8.20E-44  | 0.448319 |
| cg08772111 | 2  | HDAC4    | N_Shelf | Body    | 5.42E-52  | 1.58E-49  | 0.446714 |
| cg03159409 | 12 | FAM101A  | N_Shore | 5'UTR   | 3.64E-28  | 2.15E-26  | 0.445728 |
| cg01904886 | 12 |          |         |         | 2.46E-43  | 4.34E-41  | 0.435614 |
| cg07515565 | 6  | GMDS     | Island  | 3'UTR   | 8.02E-32  | 6.35E-30  | 0.430926 |
| cg14028622 | 4  |          | N_Shore |         | 3.26E-61  | 1.55E-58  | 0.42941  |
| cg11902748 | 20 |          | S_Shore |         | 6.22E-60  | 2.74E-57  | 0.428732 |
| cg07170824 | 12 | ACVRL1   | Island  | 1stExon | 7.80E-45  | 1.51E-42  | 0.428394 |
| cg03768916 | 10 | ARHGAP22 | Island  | TSS200  | 1.11E-87  | 2.41E-84  | 0.427959 |
| cg11075029 | 15 | SHF      | S_Shore | 5'UTR   | 1.89E-34  | 1.82E-32  | 0.427369 |
| cg05967295 | 7  | SMURF1   | Island  | 1stExon | 3.63E-54  | 1.19E-51  | 0.426797 |
| cg26523866 | 1  |          |         |         | 2.74E-44  | 5.10E-42  | 0.426322 |
| cg06947608 | 10 | C10orf90 |         | 3'UTR   | 8.27E-45  | 1.60E-42  | 0.423621 |
| cg05986007 | 5  |          |         |         | 5.80E-62  | 2.86E-59  | 0.422774 |
| cg07481360 | 3  | DLG1     |         | Body    | 1.24E-42  | 2.09E-40  | 0.420483 |
| cg05204798 | 11 | MPPED2   | Island  | 1stExon | 1.17E-88  | 2.66E-85  | 0.412241 |
| cg22538757 | 12 |          |         |         | 1.55E-29  | 1.03E-27  | 0.411849 |
| cg01713095 | 4  | ABCE1    |         | 3'UTR   | 9.88E-49  | 2.43E-46  | 0.411815 |
| cg11495544 | 17 | GRB2     | S_Shore | TSS1500 | 2.59E-36  | 2.89E-34  | 0.411712 |
| cg20980653 | 6  | COL11A2  |         | Body    | 1.51E-34  | 1.47E-32  | 0.411626 |

|            |   |         |        |      |          |          |          |
|------------|---|---------|--------|------|----------|----------|----------|
| cg25840318 | 4 |         |        |      | 1.62E-22 | 5.97E-21 | 0.408842 |
| cg02913521 | 2 | ARHGEF4 | Island | Body | 3.71E-73 | 3.40E-70 | 0.407339 |

4 **Online resource table 3.** Cosmic signatures in SWNTS-SWNs and NS-SWNs

| SWNTS-SWN      |              |              |             |             |              |              |
|----------------|--------------|--------------|-------------|-------------|--------------|--------------|
| Given tumor ID | Signature.1A | Signature.1B | Signature.2 | Signature.6 | Signature.15 | Signature.20 |
| 67             | 0            | 0            | 0           | 0           | 1            | 0            |
| 13             | 0            | 0            | 0.232237435 | 0           | 0            | 0            |
| 129            | 0            | 0            | 0           | 0           | 0            | 0            |
| 31             | 0.244648679  | 0            | 0.144203055 | 0.517653227 | 0            | 0            |
| 30             | 0.2677777    | 0            | 0           | 0.614178261 | 0            | 0            |
| 112            | 0.353869738  | 0            | 0.067998603 | 0.102731828 | 0            | 0            |
| 89             | 0.527848752  | 0            | 0           | 0.086183474 | 0.385967775  | 0            |
| 105            | 0.587312105  | 0            | 0           | 0           | 0.412687895  | 0            |
| 95             | 0.613756231  | 0            | 0           | 0           | 0.386243769  | 0            |
| 108            | 0.62390823   | 0            | 0           | 0.308910637 | 0            | 0.067181133  |
| 32             | 0.634581552  | 0            | 0           | 0.365418448 | 0            | 0            |
| 9              | 0.695786688  | 0            | 0           | 0.093327566 | 0            | 0            |
| 136            | 0.737792003  | 0            | 0           | 0           | 0.225017884  | 0            |
| 110            | 0.971872209  | 0            | 0           | 0           | 0            | 0            |
| 28             | 1            | 0            | 0           | 0           | 0            | 0            |
| 8              | 1            | 0            | 0           | 0           | 0            | 0            |
| 11             | 1            | 0            | 0           | 0           | 0            | 0            |
| 12             | 1            | 0            | 0           | 0           | 0            | 0            |
| 109            | 1            | 0            | 0           | 0           | 0            | 0            |
| 111            | 1            | 0            | 0           | 0           | 0            | 0            |
| 6              | 1            | 0            | 0           | 0           | 0            | 0            |
| 7              | 1            | 0            | 0           | 0           | 0            | 0            |
| 121            | 1            | 0            | 0           | 0           | 0            | 0            |
| 125            | 1            | 0            | 0           | 0           | 0            | 0            |
| 123            | 1            | 0            | 0           | 0           | 0            | 0            |
| 16             | 1            | 0            | 0           | 0           | 0            | 0            |
| 29             | 1            | 0            | 0           | 0           | 0            | 0            |
| 56             | 1            | 0            | 0           | 0           | 0            | 0            |
| 81             | 1            | 0            | 0           | 0           | 0            | 0            |
| NS-SWN         |              |              |             |             |              |              |
| Given tumor ID | Signature.1A | Signature.1B | Signature.2 | Signature.6 | Signature.15 | Signature.20 |
| 1              | 1            | 0            | 0           | 0           | 0            | 0            |
| 2              | 0            | 0            | 0           | 0           | 0.726384057  | 0            |
| 3              | 0            | 0            | 0           | 0           | 0.931999368  | 0            |



|    |             |             |   |             |             |             |
|----|-------------|-------------|---|-------------|-------------|-------------|
| 4  | 0           | 0           | 0 | 0           | 0.523427928 | 0           |
| 5  | 0.119553995 | 0           | 0 | 0           | 0           | 0.216622177 |
| 6  | 1           | 0           | 0 | 0           | 0           | 0           |
| 7  | 0.634581552 | 0           | 0 | 0.365418448 | 0           | 0           |
| 8  | 0.454983231 | 0           | 0 | 0.151514914 | 0           | 0.234442061 |
| 9  | 0.972873985 | 0           | 0 | 0           | 0           | 0           |
| 10 | 0.760620752 | 0           | 0 | 0.207898926 | 0           | 0           |
| 11 | 0.155134481 | 0           | 0 | 0           | 0           | 0.280862457 |
| 12 | 1           | 0           | 0 | 0           | 0           | 0           |
| 13 | 0.128204941 | 0           | 0 | 0           | 0.58183193  | 0           |
| 14 | 0.957102586 | 0           | 0 | 0           | 0           | 0           |
| 15 | 1           | 0           | 0 | 0           | 0           | 0           |
| 16 | 0.974515659 | 0           | 0 | 0           | 0           | 0           |
| 17 | 0.282107737 | 0.182593459 | 0 | 0.112263669 | 0           | 0           |
| 18 | 0           | 0           | 0 | 0           | 1           | 0           |
| 19 | 0.620837743 | 0           | 0 | 0           | 0.379162231 | 0           |
| 20 | 0.185788861 | 0           | 0 | 0.272521379 | 0.190938895 | 0           |
| 21 | 0.749829211 | 0           | 0 | 0           | 0           | 0           |
| 22 | 0.791281342 | 0           | 0 | 0           | 0           | 0           |
| 23 | 0.577027219 | 0           | 0 | 0.39906762  | 0           | 0           |

5 Online resource table 4. Sanger-validated variants and filtered variants from WES and WGS

| Patient ID | Germline mutation | Tumor | CHR | Genomic position | Gene     | Consequence | DNA alteration | Effect          |
|------------|-------------------|-------|-----|------------------|----------|-------------|----------------|-----------------|
| 28         | LZTR1             | 65    | 3   | 113765568        | KIAA1407 | frameshift  | c.141dupA      | p.Ala48Serfs*13 |
|            |                   |       | X   | 123654474        | ODZ1     | missense    | c.3194G>A      | p.Arg1065Gln    |
|            |                   |       | 22  | 30069483         | NF2      | splicing    | c.241-13T>A    | r.spl?          |
|            |                   |       | 4   | 184203857        | WWC2     | splicing    | c.2685-4A>G    | r.spl?          |
|            |                   | 64    | 1   | 6204076          | CHD5     | splicing    | c.1934+8G>A    | r.spl?          |
|            |                   |       | 1   | 54666181         | MRPL37   | missense    | c.265C>A       | p.Arg89Ser      |
|            |                   |       | 3   | 113765568        | KIAA1407 | frameshift  | c.141dupA      | p.Ala48Serfs*13 |
|            |                   |       | 6   | 47847013         | PTCHD4   | missense    | c.1567G>A      | p.Val523Ile     |
|            |                   |       | 7   | 124511062        | POT1     | missense    | c.158C>T       | p.Thr53Ile      |
|            |                   |       | 16  | 67910446         | EDC4     | nonsense    | c.295G>T       | p.Glu99*        |
|            |                   | 63    | 3   | 113765568        | KIAA1407 | frameshift  | c.141dupA      | p.Ala48Serfs*13 |
|            |                   |       | 22  | 30074313         | NF2      | splicing    | c.1325+1G>T    | r.spl?          |
|            |                   |       | X   | 123654474        | ODZ1     | missense    | c.3194G>A      | p.Arg1065Gln    |
|            |                   | 62    | 3   | 113765568        | KIAA1407 | frameshift  | c.141dupA      | p.Ala48Serfs*13 |

|    |                |     |    |           |                 |            |                |                  |
|----|----------------|-----|----|-----------|-----------------|------------|----------------|------------------|
|    |                |     | 22 | 30064372  | <i>NF2</i>      | frameshift | c.687_688delAG | p.Lys229Asnfs*19 |
|    |                |     | 9  | 132482974 | <i>PRRX2</i>    | missense   | c.547G>A       | p.Ala183Thr      |
| 3  | <i>LZTR1</i>   | 32  | 22 | 30069483  | <i>NF2</i>      | splicing   | c.1340+8G>T    | r.spl?           |
|    |                |     | X  | 103268025 | <i>H2BFWT</i>   | missense   | c.208C>T       | p.Arg70Cys       |
| 23 | <i>LZTR1</i>   | 46  | 1  | 99772184  | <i>LPPR4</i>    | missense   | c.1910C>T      | p.Pro637Leu      |
|    |                |     | 22 | 30032794  | <i>NF2</i>      | nonsense   | c.169C>T       | p.Arg57*         |
|    |                | 47  | 22 | 30069324  | <i>NF2</i>      | frameshift | c.1189delC     | p.Leu397Phefs*29 |
| 27 | <i>LZTR1</i>   | 88  | 1  | 200818596 | <i>CAMSAP2</i>  | missense   | c.2732G>A      | p.Arg911His      |
|    |                |     | 22 | 30000102  | <i>NF2</i>      | splicing   | c.114+1G>A     | r.spl?           |
|    |                |     | 22 | 30067899  | <i>NF2</i>      | nonsense   | c.1084C>T      | p.Gln362*        |
| 38 | <i>LZTR1</i>   | 89  | 3  | 43618294  | <i>ANO10</i>    | missense   | c.1052G>A      | p.Gly351Glu      |
|    |                |     | 20 | 30915460  | <i>KIF3B</i>    | missense   | c.1964A>G      | p.Tyr655Cys      |
|    |                |     | 15 | 42727650  | <i>ZNF106</i>   | missense   | c.4744A>T      | p.Thr1582Ser     |
|    |                |     | 2  | 3660954   | <i>COLEC11</i>  | missense   | c.226G>A       | p.Gly76Ser       |
|    |                |     | 1  | 109192852 | <i>HENMT1</i>   | missense   | c.737A>T       | p.Asp246Val      |
|    |                |     | 22 | 30057253  | <i>NF2</i>      | frameshift | c.735delC      | p.Pro246Leufs*5  |
|    |                |     | 1  | 225519211 | <i>DNAH14</i>   | missense   | c.9517C>T      | p.Arg3173Trp     |
|    |                |     | 15 | 81201507  | <i>CEMIP</i>    | missense   | c.1657G>A      | p.Gly553Ser      |
| 10 | <i>LZTR1</i>   | 108 | 22 | 30032747  | <i>NF2</i>      | nonsense   | c.122G>A       | p.Trp41*         |
|    |                |     | 7  | 94248102  | <i>SGCE</i>     | missense   | c.738G>C       | p.Arg246Ser      |
|    |                | 109 | 22 | 30077437  | <i>NF2</i>      | nonsense   | c.1584C>A      | p.Tyr528*        |
|    |                |     | 8  | 145675905 | <i>CYHR1</i>    | missense   | c.1072G>T      | p.Val358Phe      |
|    |                |     | 17 | 40817537  | <i>TUBG2</i>    | missense   | c.650G>A       | p.Arg217His      |
|    |                |     | 1  | 220338096 | <i>RAB3GAP2</i> | missense   | c.3133T>C      | p.Phe1045Leu     |
|    |                | 110 | 22 | 30051610  | <i>NF2</i>      | nonsense   | c.544G>T       | p.Glu182*        |
|    |                |     | X  | 31089893  | <i>FTHL17</i>   | missense   | c.178T>A       | p.Ser60Thr       |
|    |                |     | 1  | 153507257 | <i>S100A6</i>   | missense   | c.188A>T       | p.Asn63Ile       |
|    |                | 111 | 22 | 30070931  | <i>NF2</i>      | splicing   | c.1446+1G>C    | r.spl?           |
|    |                | 112 | 22 | 30057330  | <i>NF2</i>      | splicing   | c.810+2T>C     | r.spl?           |
| 2  | <i>LZTR1</i>   | 12  | 22 | 30069476  | <i>NF2</i>      | splicing   | c.1340+1G>A    | r.spl?           |
|    |                |     | 19 | 46891837  | <i>PPP5C</i>    | missense   | c.1204G>A      | p.Val402Met      |
|    |                | 13  | 22 | 30064328  | <i>NF2</i>      | nonsense   | c.892C>T       | p.Gln298*        |
|    |                |     | 18 | 32823128  | <i>ZNF397</i>   | missense   | c.427C>T       | p.Pro143Ser      |
|    |                |     | 21 | 38853117  | <i>DYRK1A</i>   | missense   | c.505T>C       | p.Ser169Pro      |
|    |                |     | 14 | 99866483  | <i>SETD3</i>    | missense   | c.1291G>A      | p.Glu431Lys      |
| 4  | <i>LZTR1</i>   | 28  | 19 | 57955010  | <i>ZNF749</i>   | nonsense   | c.494C>G       | p.Ser165*        |
| 17 | <i>SMARCB1</i> | 31  | 22 | 30051658  | <i>NF2</i>      | nonsense   | c.343C>T       | p.Arg115*        |
|    |                |     | X  | 128615117 | <i>SMARCA1</i>  | frameshift | c.2227delG     | p.Ala743Glnfs*57 |
|    |                |     | 6  | 139097303 | <i>CCDC28A</i>  | missense   | c.316G>A       | p.Ala106Thr      |

|    |                             |    |    |           |                 |                   |                |                  |
|----|-----------------------------|----|----|-----------|-----------------|-------------------|----------------|------------------|
|    |                             |    | 7  | 135106925 | <i>CNOT4</i>    | nonsense          | c.352C>T       | p.Gln118*        |
|    |                             |    | 19 | 55502038  | <i>NLRP2</i>    | missense          | c.2697G>T      | p.Leu899Phe      |
|    |                             |    | 19 | 39592142  | <i>PAPL</i>     | missense          | c.1078C>T      | p.Pro360Ser      |
|    |                             |    | 2  | 220494346 | <i>SLC4A3</i>   | intronic          | c.529+203G>T   | r.spl?           |
|    |                             |    | 19 | 39592142  | <i>ACP7</i>     | missense          | c.1078C>T      | p.Pro360Ser      |
|    |                             |    | 15 | 85405971  | <i>ALPK3</i>    | frameshift        | c.4841_4902del | p.Gly1615fs      |
|    |                             |    | 2  | 234719540 | <i>MROH2A</i>   | missense          | c.2558C>T      | p.Thr850Met      |
|    |                             |    | 2  | 234719540 | <i>HEATR7B1</i> | missense          | c.2549C>T      | p.Thr850Met      |
|    |                             |    | 10 | 69948821  | <i>MYPN</i>     | missense          | c.2038C>T      | p.Arg680Trp      |
| 11 | <i>SMARCB1</i>              | 26 | 22 | 30038245  | <i>NF2</i>      | frameshift        | c.418delC      | p.L1405fs*34     |
| 19 | <i>LZTR1-<br/>/SMARCB1-</i> | 29 | 19 | 52794246  | <i>ZNF766</i>   | missense          | c.1247A>G      | p.His416Arg      |
|    |                             |    | 22 | 30000041  | <i>NF2</i>      | frameshift        | c.54delA       | p.Gln18Hisfs*7   |
|    |                             |    | 22 | 30032842  | <i>NF2</i>      | in frame deletion | c.217_240del24 | p.Ala73_Lys80del |
|    |                             |    | 21 | 41450853  | <i>DSCAM</i>    | missense          | c.4472G>A      | p.R1491H         |
|    |                             |    | 8  | 23540375  | <i>NKX3-1</i>   | missense          | c.28G>C        | p.Gly10Arg       |
| 6  | <i>LZTR1-<br/>/SMARCB1-</i> | 14 | 11 | 57582901  | <i>CTNND1</i>   | missense          | c.2719C>T      | p.His907Tyr      |
|    |                             |    | 1  | 41483726  | <i>SLFN1</i>    | missense          | c.538C>T       | p.Pro180Ser      |
|    |                             |    | 9  | 138649038 | <i>KCNT1</i>    | missense          | c.580G>A       | p.Val194Ile      |
|    |                             |    | 22 | 24143334  | <i>SMARCB1</i>  | intronic          | c.500+66T>G    | r.spl?           |
|    |                             |    | 1  | 156256175 | <i>TMEM79</i>   | nonsense          | c.882C>A       | p.Tyr294*        |
|    |                             | 15 | 22 | 24175822  | <i>SMARCB1</i>  | frameshift        | c.1050_1053del | p.P351Cfs*5      |
| 8  | <i>LZTR1-<br/>/SMARCB1-</i> | 30 | 22 | 30057209  | <i>NF2</i>      | nonsense          | c.442G>T       | p.Glu148*        |
|    |                             |    | 11 | 124670247 | <i>MSANTD2</i>  | silent            | c.30C>T        | p.Pro10=         |
|    |                             |    | 9  | 32635479  | <i>TAF1L</i>    | silent            | c.99C>T        | p.Gly33=         |
|    |                             |    | X  | 12939330  | <i>TLR8</i>     | missense          | c.2171T>A      | p.Ile724Asn      |
|    |                             |    | 1  | 64644099  | <i>ROR1</i>     | missense          | c.2375C>T      | p.Pro792Leu      |
|    |                             |    | 14 | 25443977  | <i>STXBP6</i>   | missense          | c.48T>A        | p.Asp16Glu       |
|    |                             | 21 | 10 | 117061554 | <i>ATRNL1</i>   | splicing          | c.2818+1G>A    | r.spl?           |
|    |                             |    | 19 | 4475549   | <i>HDGFRP2</i>  | missense          | c.257A>G       | p.Asn86Ser       |
| 7  | <i>LZTR1-<br/>/SMARCB1-</i> | 16 | 1  | 147380239 | <i>GJA8</i>     | missense          | c.157G>A       | p.Val53Met       |
|    |                             |    | 17 | 11881897  | <i>ZNF18</i>    | frameshift        | c.1027delC     | p.Leu343fs       |
|    |                             |    | 9  | 117168967 | <i>WHRN</i>     | missense          | c.1904C>T      | p.Pro635Leu      |
|    |                             |    | 15 | 88679142  | <i>NTRK3</i>    | missense          | c.895C>T       | p.Leu299Phe      |
|    |                             |    | 7  | 84647608  | <i>SEMA3D</i>   | missense          | c.1505A>T      | p.His502Leu      |
|    |                             |    | 9  | 117168967 | <i>DFNB31</i>   | missense          | c.755C>T       | p.Pro252Leu      |
|    |                             |    | 22 | 30035199  | <i>NF2</i>      | nonsense          | c.361C>T       | p.Gln121*        |
|    |                             | 6  | 11 | 10503727  | <i>AMPD3</i>    | missense          | c.571G>C       | p.Gly191Arg      |
|    |                             |    | 15 | 90349492  | <i>ANPEP</i>    | missense          | c.323C>T       | p.Thr108Ile      |

|    |                     |      |          |           |             |            |                   |                    |             |
|----|---------------------|------|----------|-----------|-------------|------------|-------------------|--------------------|-------------|
| 39 | LZTR1-<br>/SMARCB1- |      | 11       | 105804674 | GRIA4       | missense   | c.2273C>T         | p.Thr758Met        |             |
|    |                     |      | 1        | 67787573  | IL12RB2     | splicing   | c.364+1G>T        | r.spl?             |             |
|    |                     |      | 22       | 30074302  | NF2         | splicing   | c.1565_1574+29del | r.spl?             |             |
|    |                     |      | 8        | 103220387 | RRM2B       | missense   | c.1246G>A         | p.Val416Ile        |             |
|    |                     |      | 11       | 62751465  | SLC22A6     | missense   | c.424A>T          | p.Met142Leu        |             |
|    |                     |      | 13       | 38211588  | TRPC4       | frameshift | c.2401delC        | p.Leu801fs*4       |             |
|    |                     |      | 95       | 17        | 73567795    | LLGL2      | missense          | c.2224A>G          | p.Ile742Val |
|    |                     |      | 22       | 30069314  | NF2         | frameshift | c.1180_1204del24  | p.(Glu394Profs*24) |             |
|    |                     |      | 12       | 48458895  | SENP1       | frameshift | c.1227dupA        | p.Gly410fs         |             |
|    |                     |      | 20       | 51871123  | TSHZ2       | nonsense   | c.1126A>T         | p.Lys376*          |             |
| 25 | LZTR1-<br>/SMARCB1- | 56   | 22       | 30035202  | NF2         | splicing   | c.363+1G>T        | r.spl?             |             |
|    |                     |      | 22       | 30032794  | NF2         | nonsense   | c.169C>T          | p.Arg57*           |             |
| 47 | LZTR1-<br>/SMARCB1- | 7    | 1        | 114968212 | TRIM33      | frameshift | 1553_1554del      | p.H518Qfs*38       |             |
|    |                     |      | 15       | 89401776  | ACAN        | missense   | c.5960T>C         | p.Leu1987Pro       |             |
|    |                     |      | 17       | 65014335  | CACNG4      | missense   | c.251A>G          | p.Asn84Ser         |             |
|    |                     |      | 1        | 111741325 | DENND2D     | missense   | c.283C>T          | p.Arg95Trp         |             |
|    |                     |      | 15       | 72460862  | GRAMD2A     | missense   | c.238GT           | p.Asp80Tyr         |             |
|    |                     |      | 22       | 30038185  | NF2         | splicing   | c.364-6_372del15  | p.Val122_Gln125del |             |
|    |                     |      | 5        | 140719445 | PCDHGA2     | missense   | c.907A>G          | p.Ile303Val        |             |
| 3  | 69117092            | UBA3 | missense | c.415T>C  | p.Cys139Arg |            |                   |                    |             |
| 33 | LZTR1-<br>/SMARCB1- | 94   | 12       | 13722812  | GRIN2B      | missense   | c.2311G>C         | p.Gly771Arg        |             |
|    |                     |      | 22       | 30057302  | NF2         | nonsense   | c.784C>T          | p.Arg262*          |             |
|    |                     |      | 22       | 50728552  | PLXNB2      | frameshift | c.461_462delTG    | p.Val154Glyfs*11   |             |
| 21 |                     | 53   | 16       | 57113508  | NLRC5       | missense   | c.5288G>A         | p.Ser1763ASN       |             |
|    |                     |      | 22       | 30074302  | NF2         | nonsense   | c.1564G>T         | p.Glu522*          |             |

## 6 Online resource table 5. Structural variants identified using WGS dataset

| Given tumor code | Coding/Non-coding SVs |           | Types of SVs |             |           |           |                        |               | Inter/Intra chromosomal SVs |                  | Total |
|------------------|-----------------------|-----------|--------------|-------------|-----------|-----------|------------------------|---------------|-----------------------------|------------------|-------|
|                  | Coding                | Noncoding | Deletion     | Duplication | Insertion | Inversion | Inverted translocation | Translocation | Interchromosomal            | Intrachromosomal |       |
| 6                | 7                     | 76        | 54           | 12          | 11        | 2         | 3                      | 1             | 4                           | 79               | 83    |
| 95               | 1                     | 66        | 41           | 12          | 7         | 5         | 2                      | 0             | 2                           | 65               | 67    |
| 9                | 7                     | 62        | 33           | 13          | 6         | 3         | 3                      | 11            | 14                          | 55               | 69    |
| 11               | 5                     | 40        | 14           | 16          | 6         | 2         | 5                      | 2             | 7                           | 38               | 45    |
| 16               | 4                     | 12        | 9            | 2           | 0         | 0         | 5                      | 0             | 5                           | 11               | 16    |
| 29               | 1                     | 52        | 42           | 6           | 3         | 0         | 2                      | 0             | 2                           | 51               | 53    |
| 30               | 8                     | 53        | 13           | 17          | 5         | 7         | 13                     | 6             | 19                          | 42               | 61    |
| 31               | 6                     | 36        | 30           | 5           | 1         | 2         | 4                      | 0             | 4                           | 38               | 42    |
| 32               | 1                     | 48        | 28           | 11          | 9         | 0         | 1                      | 0             | 1                           | 48               | 49    |
| 56               | 9                     | 71        | 26           | 42          | 6         | 1         | 2                      | 3             | 5                           | 75               | 80    |

|     |     |      |     |     |     |     |    |    |     |      |      |
|-----|-----|------|-----|-----|-----|-----|----|----|-----|------|------|
| 90  | 215 | 628  | 35  | 71  | 24  | 671 | 21 | 21 | 42  | 801  | 843  |
| 108 | 10  | 47   | 37  | 7   | 3   | 4   | 3  | 3  | 6   | 51   | 57   |
| 110 | 2   | 76   | 47  | 10  | 8   | 5   | 4  | 4  | 8   | 70   | 78   |
| 139 | 4   | 58   | 50  | 4   | 7   | 0   | 1  | 0  | 1   | 61   | 62   |
| 140 | 3   | 68   | 62  | 3   | 4   | 0   | 1  | 1  | 2   | 69   | 71   |
| 141 | 1   | 35   | 29  | 2   | 4   | 1   | 0  | 0  | 0   | 36   | 36   |
| 142 | 2   | 44   | 29  | 8   | 6   | 1   | 2  | 0  | 2   | 44   | 46   |
| 121 | 5   | 34   | 24  | 8   | 3   | 1   | 2  | 1  | 3   | 36   | 39   |
| 125 | 6   | 32   | 20  | 11  | 3   | 1   | 1  | 2  | 3   | 35   | 38   |
| 123 | 5   | 28   | 23  | 5   | 2   | 0   | 3  | 0  | 3   | 30   | 33   |
| 135 | 4   | 40   | 24  | 14  | 4   | 1   | 1  | 0  | 1   | 43   | 44   |
| 136 | 5   | 37   | 33  | 5   | 2   | 0   | 1  | 1  | 2   | 40   | 42   |
|     | 311 | 1643 | 703 | 284 | 124 | 707 | 80 | 56 | 136 | 1818 | 1954 |

7

8

9

10 **Online resource table 6.** Top 50 DEGs between SWNTS-SWNs versus NS-SWNs

| rownames(result1) | logFC        | AveExpr     | t            | P.Value  | adj.P.Val |
|-------------------|--------------|-------------|--------------|----------|-----------|
| MRPL12            | -1.295840447 | 5.399584615 | -10.14546118 | 6.09E-15 | 1.05E-10  |
| H3-3A             | 0.894150407  | 9.832830769 | 10.00582628  | 1.05E-14 | 1.05E-10  |
| MZT2B             | -2.027160569 | 8.074753846 | -9.741599188 | 2.99E-14 | 1.72E-10  |
| MRPL41            | -1.715065041 | 8.008476923 | -9.687996306 | 3.69E-14 | 1.72E-10  |
| MIF               | -1.837655488 | 6.355261538 | -9.645845326 | 4.37E-14 | 1.72E-10  |
| NME3              | -2.017502033 | 7.334661538 | -9.603497431 | 5.17E-14 | 1.72E-10  |
| PSMC1             | 0.70246748   | 10.75673846 | 9.285247482  | 1.83E-13 | 5.22E-10  |
| TSPO              | -1.744666667 | 9.010815385 | -9.050472161 | 4.70E-13 | 1.10E-09  |
| KLHL17            | -1.257163618 | 6.600938462 | -9.029765302 | 5.10E-13 | 1.10E-09  |
| JOSD2             | -1.937546748 | 7.314061538 | -9.009701235 | 5.53E-13 | 1.10E-09  |
| EVA1B             | -1.64745122  | 6.660661538 | -8.956775677 | 6.84E-13 | 1.12E-09  |
| NOXA1             | -1.752950203 | 6.768415385 | -8.943209958 | 7.22E-13 | 1.12E-09  |
| C1orf159          | -1.438025407 | 7.009353846 | -8.941382201 | 7.28E-13 | 1.12E-09  |
| ZNF649            | 1.045964431  | 9.426446154 | 8.884409155  | 9.15E-13 | 1.30E-09  |
| SCNN1D            | -1.531081301 | 7.246092308 | -8.84567566  | 1.07E-12 | 1.42E-09  |
| ARSA              | -1.45061687  | 8.869046154 | -8.823813586 | 1.17E-12 | 1.45E-09  |
| CAPN15            | -1.373416667 | 8.133892308 | -8.762559854 | 1.49E-12 | 1.68E-09  |

|          |              |             |              |          |          |
|----------|--------------|-------------|--------------|----------|----------|
| SENP3    | -0.68102439  | 8.008569231 | -8.739172613 | 1.64E-12 | 1.68E-09 |
| NDUFS7   | -1.687434959 | 8.350215385 | -8.737817162 | 1.65E-12 | 1.68E-09 |
| TPGS1    | -1.182539634 | 6.577784615 | -8.732684649 | 1.69E-12 | 1.68E-09 |
| CCDC85B  | -1.496886179 | 6.487523077 | -8.677453168 | 2.11E-12 | 1.96E-09 |
| TMUB1    | -1.253568089 | 7.128753846 | -8.670950523 | 2.16E-12 | 1.96E-09 |
| LZTR1    | -1.330223577 | 8.727230769 | -8.654690255 | 2.31E-12 | 1.97E-09 |
| HEXD     | -1.193273374 | 8.474138462 | -8.641194264 | 2.44E-12 | 1.97E-09 |
| TRAPPC6A | -1.114963415 | 7.235784615 | -8.621107995 | 2.64E-12 | 1.97E-09 |
| MXD3     | -1.174586382 | 6.614184615 | -8.619099499 | 2.66E-12 | 1.97E-09 |
| MFSD3    | -1.13435061  | 6.663138462 | -8.618043784 | 2.68E-12 | 1.97E-09 |
| FBXL15   | -1.304639228 | 6.845384615 | -8.603331066 | 2.84E-12 | 1.99E-09 |
| KIFC2    | -1.590034553 | 8.398861538 | -8.598171291 | 2.90E-12 | 1.99E-09 |
| TCIRG1   | -1.831555894 | 9.154830769 | -8.563884458 | 3.33E-12 | 2.18E-09 |
| PCSK4    | -1.096653455 | 5.904276923 | -8.559154887 | 3.39E-12 | 2.18E-09 |
| PABPN1   | -0.983788618 | 10.48287692 | -8.537633974 | 3.70E-12 | 2.31E-09 |
| SCAND1   | -1.764531504 | 7.005553846 | -8.518479395 | 4.00E-12 | 2.42E-09 |
| MIB2     | -1.664980691 | 8.069676923 | -8.510731592 | 4.13E-12 | 2.42E-09 |
| ALKBH7   | -1.428457317 | 7.329276923 | -8.492696986 | 4.44E-12 | 2.53E-09 |
| ABHD8    | -1.189502033 | 7.066384615 | -8.455661007 | 5.16E-12 | 2.81E-09 |
| ZNF787   | -0.986143293 | 7.395153846 | -8.452384339 | 5.23E-12 | 2.81E-09 |
| REX1BD   | -1.435121951 | 7.860230769 | -8.432033082 | 5.67E-12 | 2.97E-09 |
| SIRT6    | -1.084534553 | 7.450507692 | -8.400604237 | 6.44E-12 | 3.29E-09 |
| LMF2     | -1.718172764 | 8.820353846 | -8.38358086  | 6.90E-12 | 3.44E-09 |
| ZNHIT2   | -1.057114837 | 6.075753846 | -8.371046775 | 7.26E-12 | 3.53E-09 |
| RABAC1   | -1.333533537 | 7.008276923 | -8.361813406 | 7.54E-12 | 3.58E-09 |
| AP5Z1    | -1.453529472 | 8.3368      | -8.347653753 | 7.98E-12 | 3.70E-09 |
| ANTKMT   | -1.432634146 | 6.757661538 | -8.333492129 | 8.45E-12 | 3.78E-09 |
| CEBPD    | -1.521776423 | 10.27272308 | -8.33092324  | 8.54E-12 | 3.78E-09 |
| SSBP4    | -1.270667683 | 8.385123077 | -8.325784915 | 8.72E-12 | 3.78E-09 |
| ARRDC1   | -1.294432927 | 7.733738462 | -8.30838258  | 9.36E-12 | 3.97E-09 |
| BRAT1    | -1.235107724 | 8.477984615 | -8.299122335 | 9.71E-12 | 4.03E-09 |
| RPS3A    | 0.931560976  | 13.6974     | 8.285268691  | 1.03E-11 | 4.18E-09 |

## 11 Online resource table 7. Fusions identified using RNAseq dataset

| #FusionName       | Schwannomatosis |                 | Schwannoma      |               | Predicted_effect | Difference in % | Fusion_finding_method |
|-------------------|-----------------|-----------------|-----------------|---------------|------------------|-----------------|-----------------------|
|                   | #Samples (n=24) | % SWNTS samples | #Samples (n=41) | % SWN samples |                  |                 |                       |
| NAIP--OCLN        | 16              | 66.67           | 12              | 29.27         | out-of-frame     | 37.4            | BOWTIE                |
| NAIP--OCLN        | 1               | 4.17            | 1               | 2.44          | in-frame         | 1.73            | BOWTIE                |
| PPIP5K1--CATSPER2 | 5               | 20.83           | 6               | 14.63         | in-frame         | 6.2             | BOWTIE                |
| SAMD5--SASH1      | 7               | 29.17           | 2               | 4.88          | in-frame         | 24.29           | BOWTIE                |

|                   |    |       |    |       |              |       |                    |
|-------------------|----|-------|----|-------|--------------|-------|--------------------|
| CTSC--RAB38       | 12 | 50    | 14 | 34.15 | in-frame     | 15.85 | BOWTIE             |
| AZGP1--GJC3       | 12 | 50    | 20 | 48.78 | in-frame     | 1.22  | BOWTIE:BOWTIE+STAR |
| SLC29A1--HSP90AB1 | 2  | 8.33  | 1  | 2.44  | in-frame     | 5.89  | BOWTIE             |
| HDAC8--CITED1     | 1  | 4.17  | 2  | 4.88  | in-frame     | -0.71 | BOWTIE             |
| KANSL1--ARL17A    | 10 | 41.67 | 13 | 31.71 | out-of-frame | 9.96  | BOWTIE             |
| KANSL1--ARL17B    | 10 | 41.67 | 13 | 31.71 | out-of-frame | 9.96  | BOWTIE             |

12
